# Supplementary material
Source: PubMed Central journal article supplement (PMC6151283)
Supplement: NIHMS984255-supplement-si.pdf [file NIHMS984255-supplement-si.pdf]

**Supplementary Information for:**

**DNArCdb: A Database of Cancer Biomarkers in DNA Repair Genes that Includes Variants Related to Multiple Cancer Phenotypes**

Pavel Silvestrov, Sarah J. Maier, Michelle Fang, G Andrés Cisneros\*

Department of Chemistry, University of North Texas, Denton, TX, 76201, United States

TABLE S.1. p-values for SNPs from the breast cancer case-control study. Only SNPs with p-values<0.05 for at least one disease model are shown.

| SNP ref ID | multiplicative | recessive | additive | dominant |
|------------|----------------|-----------|----------|----------|
| rs7116503  | 0.01           | 0.80      | 0.70     | 0.00     |
| rs1528494  | 0.08           | 0.26      | 0.09     | 0.03     |
| rs4754231  | 0.03           | 0.02      | 0.02     | 0.09     |
| rs16952480 | 0.03           | 0.01      | 0.01     | 0.24     |
| rs16952686 | 0.02           | 0.26      | 0.44     | 0.02     |
| rs2302674  | 0.13           | 0.36      | 0.17     | 0.05     |
| rs2388256  | 0.09           | 0.03      | 0.03     | 0.36     |
| rs6499646  | 0.06           | 0.85      | 0.92     | 0.02     |
| rs7205986  | 0.06           | 0.03      | 0.02     | 0.10     |
| rs8047473  | 0.08           | 0.71      | 0.41     | 0.05     |
| rs8062891  | 0.04           | 0.94      | 0.26     | 0.02     |
| rs9924877  | 0.01           | 0.12      | 0.87     | 0.04     |
| rs2066992  | 0.05           | 0.05      | 0.04     | 0.10     |
| rs2069837  | 0.03           | 0.26      | 0.52     | 0.03     |
| rs1997605  | 0.04           | 0.52      | 0.21     | 0.01     |
| rs10075024 | 0.02           | 0.01      | 0.01     | 0.12     |
| rs6151838  | 0.02           | 0.00      | 0.00     | 0.27     |
| rs256575   | 0.09           | 0.60      | 0.83     | 0.04     |
| rs5743030  | 0.07           | 0.03      | 0.04     | 0.57     |
| rs10161263 | 0.06           | 0.03      | 0.12     | 0.87     |
| rs3219495  | 0.02           | 0.41      | 1.00     | 0.10     |
| rs804267   | 0.04           | 0.38      | 0.06     | 0.01     |
| rs804256   | 0.02           | 0.01      | 0.03     | 0.59     |
| rs2048075  | 0.08           | 0.29      | 0.05     | 0.03     |
| rs1055678  | 0.00           | 0.59      | 0.20     | 0.00     |
| rs6743106  | 0.01           | 0.04      | 0.13     | 0.04     |
| rs6715340  | 0.02           | 0.05      | 0.12     | 0.10     |

|            |      |      |      |      |
|------------|------|------|------|------|
| rs10911390 | 0.09 | 0.03 | 0.03 | 0.57 |
| rs12221107 | 0.03 | 0.04 | 0.09 | 0.20 |
| rs12241767 | 0.02 | 0.02 | 0.06 | 0.40 |
| rs1805410  | 0.07 | 0.42 | 0.15 | 0.02 |

TABLE S.2. p-values for SNPs from the prostate cancer case-control study. Only SNPS with p-values<0.05 for at least one disease model are shown.

| SNP ref ID | multiplicative | recessive | additive | dominant |
|------------|----------------|-----------|----------|----------|
| rs7160307  | 0.01           | 0.04      | 0.01     | 0.01     |
| rs7540     | 0.09           | 0.03      | 0.04     | 0.91     |
| rs12447481 | 0.05           | 0.12      | 0.06     | 0.03     |
| rs3751812  | 0.04           | 0.11      | 0.02     | 0.02     |
| rs6499653  | 0.03           | 0.01      | 0.01     | 0.18     |
| rs7190492  | 0.11           | 0.05      | 0.04     | 0.15     |
| rs7193938  | 0.06           | 0.02      | 0.04     | 0.97     |
| rs8044769  | 0.05           | 0.01      | 0.03     | 0.29     |
| rs8050136  | 0.05           | 0.12      | 0.02     | 0.02     |
| rs9302652  | 0.09           | 0.03      | 0.03     | 0.26     |
| rs175057   | 0.03           | 0.60      | 0.06     | 0.01     |
| rs10495944 | 0.13           | 0.47      | 0.23     | 0.05     |
| rs10514805 | 0.08           | 0.03      | 0.02     | 0.26     |
| rs2042649  | 0.07           | 0.33      | 0.17     | 0.03     |
| rs4608577  | 0.07           | 0.49      | 0.18     | 0.02     |
| rs4952887  | 0.07           | 0.96      | 0.61     | 0.02     |
| rs32985    | 0.09           | 0.07      | 0.03     | 0.08     |
| rs3776967  | 0.10           | 0.68      | 0.18     | 0.03     |
| rs13112390 | 0.00           | 0.02      | 0.19     | 0.07     |
| rs13112358 | 0.00           | 0.00      | 0.02     | 0.72     |
| rs2048075  | 0.08           | 0.03      | 0.04     | 0.26     |
| rs2048074  | 0.00           | 0.00      | 0.02     | 0.72     |
| rs293796   | 0.00           | 0.00      | 0.00     | 0.57     |
| rs293784   | 0.11           | 0.04      | 0.04     | 0.39     |
| rs125701   | 0.08           | 0.04      | 0.03     | 0.19     |
| rs3093872  | 0.11           | 0.95      | 0.89     | 0.04     |

TABLE S.3. p-values for SNPs from the lung cancer case-control study. Only SNPS with p-values<0.05 for at least one disease model are shown.

| SNP ref ID | multiplicative | recessive | additive | dominant |
|------------|----------------|-----------|----------|----------|
| rs7160307  | 0.05           | 0.07      | 0.07     | 0.07     |
| rs11037720 | 0.03           | 0.01      | 0.01     | 0.01     |
| rs7101434  | 0.05           | 0.01      | 0.01     | 0.01     |
| rs1528494  | 0.10           | 0.02      | 0.02     | 0.02     |
| rs1789162  | 0.04           | 0.03      | 0.03     | 0.03     |
| rs1950031  | 0.00           | 0.00      | 0.00     | 0.00     |
| rs645056   | 0.04           | 0.14      | 0.14     | 0.14     |
| rs650218   | 0.03           | 0.00      | 0.00     | 0.00     |
| rs1077340  | 0.00           | 0.00      | 0.00     | 0.00     |
| rs1075440  | 0.02           | 0.29      | 0.29     | 0.29     |
| rs11075996 | 0.00           | 0.24      | 0.24     | 0.24     |
| rs11075997 | 0.00           | 0.24      | 0.24     | 0.24     |
| rs12597786 | 0.01           | 0.19      | 0.19     | 0.19     |
| rs16953002 | 0.00           | 0.24      | 0.24     | 0.24     |
| rs16953047 | 0.19           | 0.05      | 0.05     | 0.05     |
| rs17219084 | 0.04           | 0.14      | 0.14     | 0.14     |
| rs17819033 | 0.00           | 0.00      | 0.00     | 0.00     |
| rs1861868  | 0.03           | 0.04      | 0.04     | 0.04     |
| rs4784335  | 0.00           | 0.00      | 0.00     | 0.00     |
| rs4784351  | 0.02           | 0.27      | 0.82     | 0.03     |
| rs6499646  | 0.00           | 0.02      | 0.02     | 0.02     |
| rs708262   | 0.00           | 0.00      | 0.00     | 0.00     |
| rs7188162  | 0.02           | 0.00      | 0.00     | 0.00     |
| rs7193851  | 0.00           | 0.00      | 0.00     | 0.00     |
| rs7200972  | 0.00           | 0.00      | 0.00     | 0.00     |
| rs8061239  | 0.06           | 0.04      | 0.04     | 0.04     |
| rs9302652  | 0.01           | 0.23      | 0.23     | 0.23     |
| rs9924877  | 0.08           | 0.04      | 0.20     | 0.80     |
| rs9931164  | 0.02           | 0.01      | 0.01     | 0.01     |
| rs9937234  | 0.13           | 0.04      | 0.04     | 0.04     |
| rs16478    | 0.17           | 0.04      | 0.04     | 0.04     |
| rs6536991  | 0.09           | 0.01      | 0.01     | 0.01     |
| rs184967   | 0.00           | 0.19      | 0.19     | 0.19     |
| rs245340   | 0.00           | 0.14      | 0.14     | 0.14     |
| rs245359   | 0.00           | 0.82      | 0.82     | 0.82     |
| rs245403   | 0.01           | 0.04      | 0.04     | 0.04     |
| rs245408   | 0.01           | 0.08      | 0.08     | 0.08     |
| rs249633   | 0.03           | 0.08      | 0.08     | 0.08     |

|            |      |      |      |      |
|------------|------|------|------|------|
| rs26279    | 0.00 | 0.47 | 0.47 | 0.47 |
| rs32951    | 0.04 | 0.15 | 0.15 | 0.15 |
| rs32989    | 0.00 | 0.75 | 0.75 | 0.75 |
| rs33010    | 0.00 | 0.09 | 0.42 | 0.03 |
| rs397628   | 0.00 | 0.01 | 0.01 | 0.01 |
| rs6151616  | 0.01 | 0.04 | 0.04 | 0.04 |
| rs6151653  | 0.01 | 0.17 | 0.17 | 0.17 |
| rs6151662  | 0.15 | 0.02 | 0.02 | 0.02 |
| rs6874652  | 0.04 | 0.24 | 0.24 | 0.24 |
| rs836794   | 0.03 | 0.08 | 0.08 | 0.08 |
| rs863214   | 0.02 | 0.04 | 0.04 | 0.04 |
| rs1800936  | 0.16 | 0.03 | 0.03 | 0.03 |
| rs1233287  | 0.00 | 0.00 | 0.00 | 0.00 |
| rs17806132 | 0.01 | 0.00 | 0.00 | 0.00 |
| rs256554   | 0.00 | 0.00 | 0.00 | 0.00 |
| rs256575   | 0.09 | 0.04 | 0.04 | 0.04 |
| rs12112229 | 0.02 | 0.98 | 0.98 | 0.98 |
| rs12534423 | 0.03 | 0.57 | 0.57 | 0.57 |
| rs3789940  | 0.03 | 0.29 | 0.29 | 0.29 |
| rs3767300  | 0.00 | 0.00 | 0.00 | 0.00 |
| rs11573534 | 0.00 | 0.89 | 0.61 | 0.36 |
| rs11573525 | 0.00 | 0.08 | 0.08 | 0.08 |
| rs11573504 | 0.00 | 0.16 | 0.16 | 0.16 |
| rs11573480 | 0.00 | 0.37 | 0.37 | 0.37 |
| rs11573379 | 0.06 | 0.02 | 0.02 | 0.02 |
| rs11573344 | 0.00 | 0.00 | 0.00 | 0.42 |
| rs6629916  | 0.00 | 0.00 | 0.00 | 0.09 |
| rs6526404  | 0.00 | 0.07 | 0.07 | 0.07 |
| rs5944697  | 0.00 | 0.06 | 0.06 | 0.06 |
| rs5944690  | 0.00 | 0.01 | 0.01 | 0.01 |
| rs5943997  | 0.00 | 0.19 | 0.19 | 0.19 |
| rs4898197  | 0.00 | 0.66 | 0.66 | 0.66 |
| rs4273981  | 0.00 | 0.30 | 0.30 | 0.30 |
| rs4258157  | 0.02 | 0.66 | 0.66 | 0.66 |
| rs3764770  | 0.01 | 0.92 | 0.92 | 0.92 |
| rs1858783  | 0.02 | 0.29 | 0.29 | 0.29 |
| rs673147   | 0.02 | 0.19 | 0.19 | 0.19 |
| rs667341   | 0.01 | 0.05 | 0.05 | 0.05 |
| rs2979896  | 0.09 | 1.00 | 0.61 | 0.03 |
| rs3219337  | 0.00 | 0.00 | 0.00 | 0.00 |
| rs10219203 | 0.00 | 0.00 | 0.00 | 0.00 |

|            |      |      |      |      |
|------------|------|------|------|------|
| rs4944925  | 0.05 | 0.75 | 0.75 | 0.75 |
| rs4145953  | 0.03 | 0.64 | 0.64 | 0.64 |
| rs3824999  | 0.20 | 0.04 | 0.04 | 0.04 |
| rs5744807  | 0.04 | 0.38 | 0.38 | 0.38 |
| rs9671528  | 0.11 | 0.05 | 0.05 | 0.05 |
| rs3218801  | 0.00 | 0.00 | 0.00 | 0.00 |
| rs3810925  | 0.03 | 0.07 | 0.07 | 0.07 |
| rs14419    | 0.00 | 0.00 | 0.00 | 0.00 |
| rs2307449  | 0.01 | 0.24 | 0.24 | 0.24 |
| rs694498   | 0.03 | 0.18 | 0.18 | 0.18 |
| rs5744680  | 0.00 | 0.00 | 0.00 | 0.00 |
| rs7778745  | 0.02 | 0.57 | 0.57 | 0.57 |
| rs17132385 | 0.02 | 0.06 | 0.06 | 0.06 |
| rs7660498  | 0.13 | 0.04 | 0.04 | 0.04 |
| rs472972   | 0.00 | 0.04 | 0.04 | 0.04 |
| rs3806614  | 0.06 | 0.04 | 0.04 | 0.04 |
| rs3218647  | 0.02 | 0.02 | 0.02 | 0.02 |
| rs3792135  | 0.00 | 0.00 | 0.00 | 0.00 |
| rs3087395  | 0.03 | 0.00 | 0.00 | 0.00 |
| rs1451245  | 0.19 | 0.04 | 0.04 | 0.04 |
| rs11751625 | 0.00 | 0.00 | 0.00 | 0.00 |
| rs9398269  | 0.00 | 0.00 | 0.00 | 0.00 |
| rs4945880  | 0.10 | 0.02 | 0.02 | 0.02 |
| rs462779   | 0.09 | 0.02 | 0.02 | 0.02 |
| rs240993   | 0.05 | 0.02 | 0.02 | 0.02 |
| rs240972   | 0.14 | 0.04 | 0.04 | 0.04 |
| rs240968   | 0.02 | 0.00 | 0.00 | 0.00 |
| rs12221107 | 0.00 | 0.00 | 0.00 | 0.00 |
| rs16925541 | 0.05 | 0.41 | 0.41 | 0.41 |
| rs139298   | 0.08 | 0.02 | 0.02 | 0.02 |
| rs8177832  | 0.13 | 0.02 | 0.02 | 0.02 |
| rs13415763 | 0.01 | 0.05 | 0.05 | 0.05 |
| rs7419739  | 0.07 | 0.01 | 0.01 | 0.01 |
| rs3138353  | 0.03 | 0.09 | 0.09 | 0.09 |
| rs3219487  | 0.06 | 0.02 | 0.02 | 0.02 |
| rs6982453  | 0.10 | 0.03 | 0.06 | 0.37 |
| rs4840583  | 0.00 | 0.01 | 0.01 | 0.01 |
| rs804256   | 0.01 | 0.01 | 0.01 | 0.01 |
| rs17064661 | 0.06 | 0.04 | 0.04 | 0.04 |
| rs13112358 | 0.08 | 0.01 | 0.01 | 0.01 |
| rs12501016 | 0.15 | 0.02 | 0.02 | 0.02 |

|            |      |      |      |      |
|------------|------|------|------|------|
| rs6830266  | 0.05 | 0.05 | 0.05 | 0.05 |
| rs867612   | 0.03 | 0.01 | 0.01 | 0.01 |
| rs6809452  | 0.04 | 0.04 | 0.04 | 0.04 |
| rs125701   | 0.04 | 0.01 | 0.01 | 0.01 |
| rs2027440  | 0.02 | 0.66 | 0.66 | 0.66 |
| rs1805411  | 0.00 | 0.07 | 0.07 | 0.07 |
| rs1136410  | 0.01 | 0.19 | 0.19 | 0.19 |
| rs10861152 | 0.10 | 0.02 | 0.02 | 0.02 |
| rs4135126  | 0.00 | 0.00 | 0.00 | 0.00 |
| rs4135106  | 0.07 | 0.05 | 0.05 | 0.05 |
| rs4135042  | 0.07 | 0.01 | 0.01 | 0.01 |
| rs1866074  | 0.15 | 0.02 | 0.02 | 0.02 |
| rs3219243  | 0.05 | 0.01 | 0.01 | 0.01 |
| rs2854501  | 0.01 | 0.17 | 0.17 | 0.17 |

TABLE S.4. p-values for SNPs from the pancreatic cancer case-control study. Only SNPs with p-values<0.05 for at least one disease model are shown.

| SNP ref ID | multiplicative | recessive | additive | dominant |
|------------|----------------|-----------|----------|----------|
| rs7116503  | 0.06           | 0.02      | 0.02     | 0.26     |
| rs10890735 | 0.08           | 0.04      | 0.13     | 0.72     |
| rs654093   | 0.12           | 0.25      | 0.06     | 0.05     |
| rs682334   | 0.07           | 0.18      | 0.03     | 0.03     |
| rs1008400  | 0.02           | 0.14      | 0.01     | 0.01     |
| rs10492872 | 0.01           | 0.04      | 0.01     | 0.01     |
| rs10521306 | 0.07           | 0.02      | 0.02     | 0.24     |
| rs1071501  | 0.03           | 0.01      | 0.01     | 0.58     |
| rs1075440  | 0.08           | 0.08      | 0.03     | 0.06     |
| rs10852521 | 0.05           | 0.03      | 0.02     | 0.07     |
| rs1344503  | 0.06           | 0.09      | 0.04     | 0.04     |
| rs16952686 | 0.08           | 0.98      | 0.68     | 0.03     |
| rs16953047 | 0.01           | 0.00      | 0.01     | 0.74     |
| rs17224310 | 0.05           | 0.10      | 0.04     | 0.03     |
| rs2302674  | 0.09           | 0.08      | 0.04     | 0.09     |
| rs2540766  | 0.06           | 0.74      | 0.91     | 0.03     |
| rs2665274  | 0.03           | 0.06      | 0.02     | 0.02     |
| rs2689264  | 0.01           | 0.00      | 0.01     | 0.55     |
| rs3751812  | 0.02           | 0.15      | 0.01     | 0.00     |
| rs708262   | 0.04           | 0.01      | 0.01     | 0.16     |
| rs7190492  | 0.12           | 0.05      | 0.04     | 0.23     |
| rs7195994  | 0.02           | 0.06      | 0.02     | 0.02     |
| rs7199185  | 0.01           | 0.22      | 0.55     | 0.01     |
| rs7206456  | 0.01           | 0.45      | 0.59     | 0.01     |
| rs8044769  | 0.05           | 0.02      | 0.02     | 0.17     |
| rs8050136  | 0.02           | 0.12      | 0.01     | 0.00     |
| rs9930333  | 0.07           | 0.25      | 0.04     | 0.02     |
| rs9941349  | 0.04           | 0.28      | 0.04     | 0.01     |
| rs16129    | 0.12           | 0.20      | 0.05     | 0.05     |
| rs16478    | 0.14           | 0.07      | 0.05     | 0.19     |
| rs17349    | 0.02           | 0.19      | 0.06     | 0.01     |
| rs6536991  | 0.07           | 0.87      | 0.31     | 0.03     |
| rs10514805 | 0.04           | 0.01      | 0.01     | 0.71     |
| rs4952887  | 0.04           | 0.01      | 0.01     | 0.60     |
| rs12112229 | 0.03           | 0.70      | 0.52     | 0.02     |
| rs2286680  | 0.03           | 0.81      | 0.32     | 0.01     |
| rs11573480 | 0.05           | 0.02      | 0.01     | 0.03     |
| rs6526404  | 0.09           | 0.05      | 0.03     | 0.06     |



|            |      |      |      |      |
|------------|------|------|------|------|
| rs5944697  | 0.04 | 0.02 | 0.01 | 0.05 |
| rs4898197  | 0.13 | 0.40 | 0.14 | 0.05 |
| rs4273981  | 0.08 | 0.03 | 0.02 | 0.07 |
| rs3764770  | 0.11 | 0.04 | 0.04 | 0.10 |
| rs2307449  | 0.00 | 0.00 | 0.00 | 0.01 |
| rs2247233  | 0.01 | 0.01 | 0.00 | 0.02 |
| rs976072   | 0.00 | 0.01 | 0.00 | 0.01 |
| rs13141668 | 0.07 | 0.59 | 0.84 | 0.04 |
| rs16832303 | 0.01 | 0.33 | 0.09 | 0.00 |
| rs3218651  | 0.04 | 0.30 | 0.08 | 0.01 |
| rs1174657  | 0.05 | 0.16 | 0.03 | 0.02 |
| rs1174658  | 0.05 | 0.16 | 0.03 | 0.02 |
| rs6546418  | 0.09 | 0.07 | 0.04 | 0.09 |
| rs3138353  | 0.11 | 0.04 | 0.08 | 0.96 |
| rs140693   | 0.06 | 0.02 | 0.02 | 0.36 |
| rs17754589 | 0.08 | 0.41 | 0.14 | 0.02 |
| rs8191649  | 0.04 | 0.94 | 0.36 | 0.01 |
| rs12645561 | 0.08 | 0.03 | 0.05 | 0.94 |
| rs6850861  | 0.05 | 0.04 | 0.11 | 0.38 |
| rs6834946  | 0.08 | 0.04 | 0.07 | 0.66 |
| rs3805169  | 0.07 | 0.02 | 0.02 | 0.58 |
| rs1876268  | 0.02 | 0.07 | 0.11 | 0.04 |
| rs1055678  | 0.11 | 0.56 | 0.28 | 0.04 |
| rs3093921  | 0.04 | 0.21 | 0.13 | 0.02 |
| rs4135064  | 0.12 | 0.04 | 0.06 | 0.98 |
| rs1866074  | 0.05 | 0.10 | 0.02 | 0.02 |

TABLE S.5. p-values for SNPs from the chronic lymphocytic leukemia case-control study. Only SNPS with p-values<0.05 for at least one disease model are shown.

| SNP ref ID | multiplicative | recessive | additive | dominant |
|------------|----------------|-----------|----------|----------|
| rs10521307 | 0.11           | 0.04      | 0.04     | 0.29     |
| rs1075440  | 0.03           | 0.02      | 0.01     | 0.06     |
| rs10852523 | 0.02           | 0.01      | 0.01     | 0.07     |
| rs11075994 | 0.02           | 0.08      | 0.01     | 0.01     |
| rs11075996 | 0.02           | 0.01      | 0.01     | 0.07     |
| rs11075997 | 0.02           | 0.01      | 0.01     | 0.07     |
| rs11642841 | 0.02           | 0.29      | 0.71     | 0.03     |
| rs12324955 | 0.02           | 0.01      | 0.07     | 0.61     |
| rs12799548 | 0.11           | 0.05      | 0.04     | 0.24     |
| rs12806569 | 0.10           | 0.39      | 0.15     | 0.03     |
| rs1474347  | 0.08           | 0.03      | 0.12     | 0.83     |
| rs1554316  | 0.10           | 0.34      | 0.12     | 0.03     |
| rs1554606  | 0.12           | 0.04      | 0.10     | 0.61     |
| rs16131    | 0.13           | 0.49      | 0.23     | 0.04     |
| rs16139    | 0.11           | 0.63      | 0.82     | 0.05     |
| rs17219084 | 0.03           | 0.01      | 0.01     | 0.13     |
| rs17818824 | 0.07           | 0.02      | 0.02     | 0.31     |
| rs17819033 | 0.06           | 0.02      | 0.02     | 0.20     |
| rs17823199 | 0.06           | 0.02      | 0.12     | 0.85     |
| rs17825554 | 0.02           | 0.03      | 0.05     | 0.16     |
| rs1861868  | 0.07           | 0.03      | 0.19     | 0.92     |
| rs2069832  | 0.13           | 0.05      | 0.15     | 0.83     |
| rs2111115  | 0.01           | 0.07      | 0.00     | 0.00     |
| rs2665275  | 0.05           | 0.02      | 0.01     | 0.22     |
| rs6499652  | 0.01           | 0.06      | 0.00     | 0.00     |
| rs6499662  | 0.10           | 0.08      | 0.03     | 0.09     |
| rs654093   | 0.02           | 0.01      | 0.07     | 0.92     |
| rs667741   | 0.01           | 0.01      | 0.07     | 0.95     |
| rs682334   | 0.03           | 0.01      | 0.08     | 0.93     |
| rs7185783  | 0.03           | 0.15      | 0.45     | 0.08     |
| rs7192835  | 0.01           | 0.16      | 0.49     | 0.02     |
| rs7203572  | 0.05           | 0.02      | 0.02     | 0.16     |
| rs7205009  | 0.00           | 0.05      | 0.00     | 0.00     |
| rs8056199  | 0.05           | 0.02      | 0.02     | 0.16     |
| rs9921255  | 0.00           | 0.02      | 0.19     | 0.07     |
| rs139297   | 0.01           | 0.02      | 0.00     | 0.01     |
| rs3998860  | 0.03           | 0.36      | 0.09     | 0.01     |
| rs5757465  | 0.05           | 0.59      | 0.09     | 0.02     |

|            |      |      |      |      |
|------------|------|------|------|------|
| rs10235277 | 0.09 | 0.04 | 0.08 | 0.95 |
| rs12534423 | 0.09 | 0.03 | 0.03 | 0.42 |
| rs2035256  | 0.06 | 0.02 | 0.05 | 0.55 |
| rs3136247  | 0.03 | 0.01 | 0.03 | 0.95 |
| rs4608577  | 0.05 | 0.54 | 0.92 | 0.04 |
| rs5742959  | 0.08 | 0.36 | 0.50 | 0.05 |
| rs6151599  | 0.14 | 0.06 | 0.05 | 0.30 |
| rs6151735  | 0.13 | 0.06 | 0.05 | 0.30 |
| rs6151826  | 0.06 | 0.33 | 0.20 | 0.02 |
| rs1055362  | 0.05 | 0.64 | 0.58 | 0.03 |
| rs10870483 | 0.01 | 0.25 | 0.02 | 0.00 |
| rs11094975 | 0.01 | 0.42 | 0.79 | 0.09 |
| rs11573504 | 0.00 | 0.04 | 0.33 | 0.39 |
| rs11573534 | 0.05 | 0.68 | 0.66 | 0.10 |
| rs11709726 | 0.03 | 0.79 | 0.13 | 0.01 |
| rs12761715 | 0.08 | 0.04 | 0.07 | 0.73 |
| rs13402784 | 0.04 | 0.56 | 0.87 | 0.03 |
| rs1381058  | 0.02 | 0.75 | 0.11 | 0.01 |
| rs14302    | 0.01 | 0.27 | 0.02 | 0.00 |
| rs1549067  | 0.05 | 0.51 | 0.72 | 0.04 |
| rs1893362  | 0.13 | 0.04 | 0.05 | 0.42 |
| rs2030531  | 0.03 | 0.78 | 0.14 | 0.01 |
| rs3087370  | 0.00 | 0.00 | 0.02 | 0.82 |
| rs3135056  | 0.11 | 0.40 | 0.21 | 0.04 |
| rs3218642  | 0.07 | 0.03 | 0.04 | 0.74 |
| rs3730476  | 0.04 | 0.52 | 0.67 | 0.03 |
| rs3767300  | 0.01 | 0.21 | 0.01 | 0.00 |
| rs3789940  | 0.01 | 0.01 | 0.01 | 0.06 |
| rs4883536  | 0.05 | 0.05 | 0.02 | 0.06 |
| rs4883537  | 0.06 | 0.04 | 0.02 | 0.06 |
| rs4883543  | 0.07 | 0.05 | 0.02 | 0.09 |
| rs4883544  | 0.02 | 0.25 | 0.02 | 0.00 |
| rs4898197  | 0.00 | 0.05 | 0.41 | 0.41 |
| rs4898297  | 0.00 | 0.18 | 0.72 | 0.04 |
| rs4898299  | 0.00 | 0.13 | 0.78 | 0.03 |
| rs4944926  | 0.13 | 0.05 | 0.04 | 0.27 |
| rs5744707  | 0.09 | 0.18 | 0.09 | 0.05 |
| rs5744844  | 0.07 | 0.05 | 0.02 | 0.07 |
| rs5744857  | 0.08 | 0.06 | 0.02 | 0.07 |
| rs5744944  | 0.07 | 0.05 | 0.02 | 0.08 |
| rs5943997  | 0.02 | 0.26 | 0.97 | 0.21 |

|            |      |      |      |      |
|------------|------|------|------|------|
| rs5944671  | 0.00 | 0.20 | 0.57 | 0.02 |
| rs5944688  | 0.00 | 0.06 | 0.47 | 0.38 |
| rs5944689  | 0.00 | 0.05 | 0.83 | 0.08 |
| rs5944695  | 0.00 | 0.08 | 0.59 | 0.25 |
| rs5944697  | 0.00 | 0.07 | 0.55 | 0.29 |
| rs5944708  | 0.00 | 0.11 | 0.81 | 0.19 |
| rs6526404  | 0.01 | 0.48 | 0.09 | 0.00 |
| rs7110993  | 0.14 | 0.06 | 0.05 | 0.26 |
| rs7660498  | 0.14 | 0.74 | 0.59 | 0.05 |
| rs7947345  | 0.13 | 0.05 | 0.04 | 0.26 |
| rs7963858  | 0.07 | 0.11 | 0.03 | 0.04 |
| rs929313   | 0.00 | 0.15 | 0.60 | 0.01 |
| rs1013358  | 0.06 | 0.02 | 0.03 | 0.69 |
| rs11715850 | 0.03 | 0.01 | 0.01 | 0.17 |
| rs159150   | 0.00 | 0.00 | 0.00 | 0.25 |
| rs1805410  | 0.00 | 0.37 | 0.98 | 0.00 |
| rs1876268  | 0.05 | 0.03 | 0.03 | 0.32 |
| rs2271347  | 0.02 | 0.19 | 0.74 | 0.06 |
| rs2541622  | 0.02 | 0.01 | 0.02 | 0.99 |
| rs2541632  | 0.02 | 0.00 | 0.00 | 0.25 |
| rs2666428  | 0.06 | 0.54 | 0.11 | 0.02 |
| rs293784   | 0.00 | 0.00 | 0.00 | 0.31 |
| rs293794   | 0.00 | 0.00 | 0.00 | 0.26 |
| rs293795   | 0.00 | 0.00 | 0.00 | 0.61 |
| rs3093872  | 0.04 | 0.07 | 0.05 | 0.05 |
| rs3213356  | 0.06 | 0.82 | 0.29 | 0.03 |
| rs3219090  | 0.05 | 0.58 | 0.12 | 0.02 |
| rs3219110  | 0.02 | 0.02 | 0.18 | 0.76 |
| rs3754376  | 0.06 | 0.55 | 0.12 | 0.02 |
| rs3785288  | 0.03 | 0.01 | 0.02 | 0.97 |
| rs4135054  | 0.02 | 0.01 | 0.01 | 0.17 |
| rs4135064  | 0.01 | 0.00 | 0.00 | 0.16 |
| rs6982453  | 0.03 | 0.17 | 0.97 | 0.11 |
| rs8191613  | 0.06 | 0.02 | 0.02 | 0.74 |
| rs8191664  | 0.06 | 0.02 | 0.02 | 0.74 |
| rs8679     | 0.02 | 0.12 | 0.54 | 0.10 |
| rs9994685  | 0.07 | 0.04 | 0.05 | 0.32 |

TABLE S.6. p-values for SNPs from the Diffuse large B-cell lymphoma case-control study. Only SNPS with p-values<0.05 for at least one disease model are shown.

| SNP ref ID | multiplicative | recessive | additive | dominant |
|------------|----------------|-----------|----------|----------|
| rs1075440  | 0.09           | 0.07      | 0.03     | 0.09     |
| rs11076010 | 0.02           | 0.01      | 0.01     | 0.74     |
| rs13284    | 0.02           | 0.19      | 0.04     | 0.01     |
| rs1362570  | 0.04           | 0.01      | 0.01     | 0.60     |
| rs1563371  | 0.02           | 0.20      | 0.04     | 0.01     |
| rs17732024 | 0.06           | 0.43      | 0.19     | 0.02     |
| rs17818824 | 0.10           | 0.36      | 0.14     | 0.04     |
| rs17819063 | 0.04           | 0.02      | 0.01     | 0.10     |
| rs1861868  | 0.06           | 0.03      | 0.17     | 0.94     |
| rs2111115  | 0.11           | 0.34      | 0.07     | 0.04     |
| rs2160305  | 0.05           | 0.02      | 0.02     | 0.22     |
| rs2254638  | 0.05           | 0.02      | 0.02     | 0.55     |
| rs2738963  | 0.06           | 0.02      | 0.02     | 0.63     |
| rs3088233  | 0.02           | 0.20      | 0.04     | 0.01     |
| rs4783826  | 0.10           | 0.28      | 0.05     | 0.03     |
| rs4784329  | 0.01           | 0.03      | 0.48     | 0.18     |
| rs6499652  | 0.08           | 0.30      | 0.06     | 0.03     |
| rs6536991  | 0.01           | 0.30      | 0.86     | 0.01     |
| rs7112793  | 0.06           | 0.05      | 0.06     | 0.25     |
| rs7143265  | 0.12           | 0.96      | 0.55     | 0.05     |
| rs7160307  | 0.12           | 0.99      | 0.57     | 0.05     |
| rs7185783  | 0.04           | 0.02      | 0.05     | 0.76     |
| rs7188162  | 0.03           | 0.01      | 0.01     | 0.74     |
| rs7203572  | 0.13           | 0.47      | 0.19     | 0.05     |
| rs7205009  | 0.06           | 0.31      | 0.05     | 0.02     |
| rs8061518  | 0.05           | 0.02      | 0.07     | 0.86     |
| rs9806929  | 0.03           | 0.01      | 0.01     | 0.89     |
| rs9922619  | 0.12           | 0.04      | 0.09     | 0.57     |
| rs9924877  | 0.08           | 0.03      | 0.04     | 0.41     |
| rs9932411  | 0.08           | 0.92      | 0.22     | 0.03     |
| rs9934504  | 0.02           | 0.95      | 0.36     | 0.01     |
| rs1233276  | 0.05           | 0.02      | 0.03     | 0.62     |
| rs12534423 | 0.06           | 0.02      | 0.02     | 0.58     |
| rs1382539  | 0.06           | 0.02      | 0.04     | 0.68     |

|            |      |      |      |      |
|------------|------|------|------|------|
| rs1540354  | 0.09 | 0.04 | 0.03 | 0.20 |
| rs1650666  | 0.12 | 0.04 | 0.07 | 0.65 |
| rs1677703  | 0.13 | 0.04 | 0.07 | 0.56 |
| rs2035256  | 0.01 | 0.26 | 0.02 | 0.00 |
| rs3136247  | 0.01 | 0.01 | 0.06 | 0.45 |
| rs6753135  | 0.03 | 0.18 | 0.49 | 0.05 |
| rs7709909  | 0.07 | 0.16 | 0.04 | 0.03 |
| rs7712332  | 0.03 | 0.06 | 0.01 | 0.02 |
| rs1055362  | 0.07 | 0.24 | 0.02 | 0.02 |
| rs1549067  | 0.07 | 0.24 | 0.02 | 0.02 |
| rs2307441  | 0.07 | 0.02 | 0.06 | 0.94 |
| rs2976239  | 0.06 | 0.02 | 0.05 | 0.94 |
| rs3730463  | 0.13 | 0.04 | 0.10 | 0.92 |
| rs3730476  | 0.07 | 0.24 | 0.02 | 0.02 |
| rs3730478  | 0.13 | 0.04 | 0.10 | 0.92 |
| rs7963858  | 0.11 | 0.28 | 0.04 | 0.04 |
| rs139297   | 0.11 | 0.10 | 0.04 | 0.07 |
| rs16861394 | 0.08 | 0.60 | 0.80 | 0.04 |
| rs2076472  | 0.00 | 0.01 | 0.00 | 0.00 |
| rs10007075 | 0.09 | 0.03 | 0.07 | 0.87 |
| rs13112358 | 0.08 | 0.04 | 0.10 | 0.86 |
| rs13112390 | 0.06 | 0.02 | 0.04 | 0.91 |
| rs13140743 | 0.03 | 0.01 | 0.03 | 0.91 |
| rs1534862  | 0.11 | 0.08 | 0.04 | 0.11 |
| rs1805410  | 0.00 | 0.00 | 0.02 | 0.50 |
| rs1876268  | 0.02 | 0.02 | 0.02 | 0.25 |
| rs2010628  | 0.11 | 0.04 | 0.04 | 0.41 |
| rs2048073  | 0.02 | 0.00 | 0.01 | 0.56 |
| rs2301416  | 0.07 | 0.38 | 0.17 | 0.02 |
| rs2307293  | 0.10 | 0.05 | 0.04 | 0.25 |
| rs2353005  | 0.06 | 0.02 | 0.05 | 0.93 |
| rs2854496  | 0.07 | 0.03 | 0.08 | 0.83 |
| rs2877985  | 0.11 | 0.03 | 0.04 | 0.64 |
| rs293784   | 0.02 | 0.08 | 0.29 | 0.10 |
| rs293795   | 0.02 | 0.18 | 0.61 | 0.05 |
| rs3093872  | 0.07 | 0.25 | 0.19 | 0.04 |
| rs3136817  | 0.10 | 0.03 | 0.04 | 0.38 |
| rs3219110  | 0.07 | 0.02 | 0.10 | 0.69 |

|           |      |      |      |      |
|-----------|------|------|------|------|
| rs3219472 | 0.06 | 0.03 | 0.11 | 0.76 |
| rs3219484 | 0.07 | 0.03 | 0.02 | 0.18 |
| rs3219492 | 0.06 | 0.02 | 0.02 | 0.33 |
| rs3802168 | 0.01 | 0.01 | 0.03 | 0.25 |
| rs4840583 | 0.11 | 0.04 | 0.06 | 0.36 |
| rs6982453 | 0.13 | 0.28 | 0.06 | 0.05 |
| rs804267  | 0.06 | 0.18 | 0.04 | 0.02 |
| rs8191604 | 0.07 | 0.03 | 0.02 | 0.23 |
| rs9821282 | 0.03 | 0.03 | 0.13 | 0.32 |
| rs9994685 | 0.02 | 0.02 | 0.02 | 0.25 |

TABLE S.7. p-values for SNPs from the follicular lymphoma case-control study. Only SNPs with p-values<0.05 for at least one disease model are shown.

| SNP ref ID | multiplicative | recessive | additive | dominant |
|------------|----------------|-----------|----------|----------|
| rs1121980  | 0.06           | 0.03      | 0.14     | 0.99     |
| rs12933996 | 0.04           | 0.98      | 0.22     | 0.02     |
| rs12935710 | 0.13           | 0.06      | 0.04     | 0.20     |
| rs13334933 | 0.01           | 0.27      | 0.06     | 0.00     |
| rs1344502  | 0.05           | 0.61      | 0.35     | 0.03     |
| rs16952520 | 0.06           | 0.32      | 0.21     | 0.02     |
| rs17732024 | 0.02           | 0.53      | 0.98     | 0.01     |
| rs17823199 | 0.05           | 0.38      | 0.61     | 0.06     |
| rs2075202  | 0.06           | 0.85      | 0.94     | 0.02     |
| rs2111115  | 0.11           | 0.73      | 0.17     | 0.04     |
| rs6499652  | 0.12           | 0.62      | 0.15     | 0.04     |
| rs6536991  | 0.01           | 0.08      | 0.50     | 0.06     |
| rs7186637  | 0.01           | 0.29      | 0.06     | 0.00     |
| rs7192835  | 0.03           | 0.63      | 0.26     | 0.01     |
| rs7194907  | 0.02           | 0.02      | 0.35     | 0.40     |
| rs7205009  | 0.10           | 0.89      | 0.22     | 0.04     |
| rs8053966  | 0.13           | 0.04      | 0.05     | 0.43     |
| rs9921255  | 0.06           | 0.79      | 0.29     | 0.02     |
| rs9924072  | 0.08           | 0.11      | 0.03     | 0.04     |
| rs9924877  | 0.11           | 0.56      | 0.15     | 0.04     |
| rs9930333  | 0.05           | 0.02      | 0.12     | 0.98     |
| rs9932411  | 0.09           | 0.82      | 0.35     | 0.05     |
| rs9939973  | 0.04           | 0.02      | 0.13     | 0.93     |
| rs10191478 | 0.05           | 0.06      | 0.46     | 0.37     |
| rs1540354  | 0.00           | 0.00      | 0.00     | 0.61     |
| rs3774332  | 0.04           | 0.07      | 0.16     | 0.18     |
| rs6151630  | 0.03           | 0.45      | 0.67     | 0.01     |
| rs1055362  | 0.07           | 0.18      | 0.05     | 0.03     |
| rs11573531 | 0.10           | 0.09      | 0.04     | 0.04     |
| rs12432605 | 0.13           | 0.96      | 0.50     | 0.05     |
| rs1549067  | 0.05           | 0.21      | 0.04     | 0.02     |
| rs1726801  | 0.04           | 0.02      | 0.03     | 0.63     |
| rs2445830  | 0.01           | 0.00      | 0.01     | 0.63     |
| rs2445837  | 0.01           | 0.01      | 0.02     | 0.33     |
| rs2976239  | 0.07           | 0.35      | 0.51     | 0.04     |



|            |      |      |      |      |
|------------|------|------|------|------|
| rs2979422  | 0.03 | 0.22 | 0.62 | 0.04 |
| rs3087370  | 0.07 | 0.03 | 0.11 | 0.86 |
| rs3136788  | 0.05 | 0.38 | 0.24 | 0.02 |
| rs3730476  | 0.06 | 0.25 | 0.06 | 0.02 |
| rs4898197  | 0.09 | 0.07 | 0.03 | 0.04 |
| rs5744903  | 0.13 | 0.73 | 0.45 | 0.04 |
| rs677740   | 0.11 | 0.62 | 0.36 | 0.04 |
| rs2076472  | 0.06 | 0.06 | 0.02 | 0.06 |
| rs10013040 | 0.09 | 0.96 | 0.41 | 0.04 |
| rs1001581  | 0.05 | 0.84 | 0.32 | 0.02 |
| rs1130409  | 0.04 | 0.01 | 0.06 | 0.59 |
| rs1136410  | 0.03 | 0.40 | 0.13 | 0.01 |
| rs167715   | 0.01 | 0.47 | 0.96 | 0.00 |
| rs1805410  | 0.00 | 0.01 | 0.08 | 0.12 |
| rs1805411  | 0.03 | 0.34 | 0.11 | 0.01 |
| rs2293464  | 0.01 | 0.01 | 0.00 | 0.03 |
| rs2666428  | 0.00 | 0.02 | 0.00 | 0.00 |
| rs2793658  | 0.03 | 0.31 | 0.10 | 0.01 |
| rs2854496  | 0.05 | 0.11 | 0.04 | 0.03 |
| rs2854501  | 0.03 | 0.01 | 0.01 | 0.19 |
| rs2854509  | 0.02 | 0.01 | 0.01 | 0.33 |
| rs2877985  | 0.07 | 0.05 | 0.10 | 0.52 |
| rs3093872  | 0.01 | 0.43 | 0.25 | 0.00 |
| rs3093930  | 0.02 | 0.35 | 0.05 | 0.01 |
| rs3136817  | 0.14 | 0.06 | 0.05 | 0.21 |
| rs3219090  | 0.00 | 0.01 | 0.00 | 0.00 |
| rs3219104  | 0.03 | 0.35 | 0.11 | 0.01 |
| rs3219110  | 0.00 | 0.00 | 0.02 | 0.84 |
| rs3219474  | 0.13 | 0.66 | 0.46 | 0.04 |
| rs3219484  | 0.02 | 0.01 | 0.01 | 0.30 |
| rs3754376  | 0.00 | 0.01 | 0.00 | 0.00 |
| rs6664761  | 0.02 | 0.01 | 0.00 | 0.05 |
| rs804292   | 0.08 | 0.05 | 0.03 | 0.10 |
| rs907190   | 0.02 | 0.31 | 0.10 | 0.01 |

TABLE S.8. p-values for SNPs from the marginal zone lymphoma case-control study. Only SNPS with p-values<0.05 for at least one disease model are shown.

| SNP ref ID | multiplicative | recessive | additive | dominant |
|------------|----------------|-----------|----------|----------|
| rs11037703 | 0.02           | 0.02      | 0.18     | 0.43     |
| rs11076008 | 0.10           | 0.46      | 0.18     | 0.03     |
| rs12445162 | 0.11           | 0.90      | 0.71     | 0.04     |
| rs12806569 | 0.09           | 0.94      | 0.50     | 0.03     |
| rs1518818  | 0.05           | 0.92      | 0.41     | 0.02     |
| rs1554316  | 0.09           | 0.98      | 0.48     | 0.03     |
| rs16952634 | 0.04           | 0.20      | 0.08     | 0.01     |
| rs16952649 | 0.02           | 0.19      | 0.09     | 0.01     |
| rs2254638  | 0.08           | 0.34      | 0.16     | 0.03     |
| rs2271820  | 0.09           | 0.90      | 0.46     | 0.04     |
| rs2738963  | 0.08           | 0.25      | 0.12     | 0.03     |
| rs6499643  | 0.02           | 0.01      | 0.01     | 0.14     |
| rs7107050  | 0.07           | 0.93      | 0.44     | 0.03     |
| rs7193851  | 0.07           | 0.37      | 0.17     | 0.02     |
| rs7199716  | 0.14           | 0.43      | 0.10     | 0.05     |
| rs12515548 | 0.07           | 0.02      | 0.03     | 0.81     |
| rs6753135  | 0.02           | 0.21      | 0.58     | 0.03     |
| rs11094975 | 0.04           | 0.03      | 0.14     | 0.94     |
| rs11573531 | 0.00           | 0.00      | 0.03     | 0.96     |
| rs11937432 | 0.05           | 0.03      | 0.02     | 0.20     |
| rs1858783  | 0.05           | 0.27      | 0.69     | 0.06     |
| rs2075070  | 0.12           | 0.06      | 0.04     | 0.15     |
| rs2143296  | 0.03           | 0.01      | 0.01     | 0.24     |
| rs2233025  | 0.05           | 0.02      | 0.01     | 0.24     |
| rs2353552  | 0.08           | 0.91      | 0.44     | 0.03     |
| rs3087374  | 0.12           | 0.85      | 0.64     | 0.04     |
| rs465969   | 0.08           | 0.69      | 0.95     | 0.03     |
| rs487989   | 0.05           | 0.22      | 0.59     | 0.08     |
| rs4883536  | 0.08           | 0.92      | 0.39     | 0.04     |
| rs668735   | 0.04           | 0.26      | 0.67     | 0.07     |
| rs7963858  | 0.04           | 0.16      | 0.77     | 0.13     |
| rs3998860  | 0.06           | 0.02      | 0.02     | 0.39     |
| rs1001581  | 0.09           | 0.83      | 0.20     | 0.03     |
| rs12611088 | 0.09           | 0.84      | 0.40     | 0.05     |
| rs167715   | 0.11           | 0.60      | 0.32     | 0.03     |

|           |      |      |      |      |
|-----------|------|------|------|------|
| rs3093872 | 0.03 | 0.82 | 0.59 | 0.01 |
| rs3093921 | 0.05 | 0.07 | 0.05 | 0.07 |
| rs3213356 | 0.15 | 0.05 | 0.08 | 0.46 |
| rs3219484 | 0.04 | 0.02 | 0.02 | 0.75 |
| rs3219487 | 0.12 | 0.04 | 0.04 | 0.44 |

TABLE S.9 SNPs significantly ( $p < 0.05$ ) linked to more than one cancer type. v indicates the link between a genetic variant and disease. SNPs for polymerase genes for breast and prostate cancers are from Swett et al<sup>15</sup>.

| SNP ID     | Gene        | breast | prostate | lung | pancreatic | CLL | DLBCL | FL | MZL |
|------------|-------------|--------|----------|------|------------|-----|-------|----|-----|
| rs7160307  | <i>ABH1</i> |        | v        | v    |            |     | v     |    |     |
| rs7116503  | <i>ABH3</i> | v      |          |      | v          |     |       |    |     |
| rs12806569 | <i>ABH3</i> |        |          |      |            | v   |       |    | v   |
| rs1554316  | <i>ABH3</i> |        |          |      |            | v   |       |    | v   |
| rs17732024 | <i>ABH5</i> |        |          |      |            |     | v     | v  |     |
| rs1528494  | <i>ABH8</i> | v      |          | v    |            |     |       |    |     |
| rs654093   | <i>ABH8</i> |        |          |      | v          | v   |       |    |     |
| rs682334   | <i>ABH8</i> |        |          |      | v          | v   |       |    |     |
| rs16952686 | <i>FTO</i>  | v      |          |      | v          |     |       |    |     |
| rs2302674  | <i>FTO</i>  | v      |          |      | v          |     |       |    |     |
| rs6499646  | <i>FTO</i>  | v      |          | v    |            |     |       |    |     |
| rs9924877  | <i>FTO</i>  | v      |          | v    |            |     | v     | v  |     |
| rs8044769  | <i>FTO</i>  |        | v        |      | v          |     |       |    |     |
| rs9302652  | <i>FTO</i>  |        | v        | v    |            |     |       |    |     |
| rs7190492  | <i>FTO</i>  |        | v        |      | v          |     |       |    |     |
| rs8050136  | <i>FTO</i>  |        | v        |      | v          |     |       |    |     |
| rs1075440  | <i>FTO</i>  |        |          | v    | v          | v   | v     |    |     |
| rs11075997 | <i>FTO</i>  |        |          | v    |            | v   |       |    |     |
| rs16953047 | <i>FTO</i>  |        |          | v    | v          |     |       |    |     |
| rs17219084 | <i>FTO</i>  |        |          | v    |            | v   |       |    |     |
| rs17819033 | <i>FTO</i>  |        |          | v    |            | v   |       |    |     |
| rs1861868  | <i>FTO</i>  |        |          | v    |            | v   | v     |    |     |
| rs708262   | <i>FTO</i>  |        |          | v    | v          |     |       |    |     |
| rs7188162  | <i>FTO</i>  |        |          | v    |            |     | v     |    |     |
| rs7193851  | <i>FTO</i>  |        |          | v    |            |     |       |    | v   |
| rs9930333  | <i>FTO</i>  |        |          |      | v          |     |       | v  |     |
| rs17818824 | <i>FTO</i>  |        |          |      |            | v   | v     |    |     |
| rs17823199 | <i>FTO</i>  |        |          |      |            | v   |       | v  |     |
| rs2111115  | <i>FTO</i>  |        |          |      |            | v   | v     | v  |     |
| rs6499652  | <i>FTO</i>  |        |          |      |            | v   | v     | v  |     |
| rs7203572  | <i>FTO</i>  |        |          |      |            | v   | v     |    |     |
| rs7185783  | <i>FTO</i>  |        |          |      |            | v   | v     |    |     |
| rs7192835  | <i>FTO</i>  |        |          |      |            | v   |       | v  |     |
| rs7205009  | <i>FTO</i>  |        |          |      |            | v   | v     | v  |     |
| rs9921255  | <i>FTO</i>  |        |          |      |            | v   |       | v  |     |
| rs9932411  | <i>FTO</i>  |        |          |      |            |     | v     | v  |     |
| rs1540354  | <i>MLH1</i> |        |          |      |            |     | v     | v  |     |

|            |               |   |   |   |   |   |   |   |   |
|------------|---------------|---|---|---|---|---|---|---|---|
| rs10514805 | <i>MSH2</i>   |   | v |   | v |   |   |   |   |
| rs4608577  | <i>MSH2</i>   |   | v |   |   | v |   |   |   |
| rs6753135  | <i>MSH2</i>   |   |   |   |   |   | v |   | v |
| rs4952887  | <i>MSH2</i>   |   | v |   | v |   |   |   |   |
| rs2035256  | <i>MSH3</i>   |   |   |   |   | v | v |   |   |
| rs3136247  | <i>MSH6</i>   |   |   |   |   | v | v |   |   |
| rs12534423 | <i>PMS2</i>   |   |   |   |   | v | v |   |   |
| rs3789940  | <i>DNTT</i>   |   |   | v |   | v |   |   |   |
| rs3767300  | <i>MAD2L2</i> |   |   | v |   | v |   |   |   |
| rs11573480 | <i>POLA1</i>  |   |   | v | v |   |   |   |   |
| rs6526404  | <i>POLA1</i>  |   |   | v | v | v |   |   |   |
| rs5944697  | <i>POLA1</i>  |   |   | v | v | v |   |   |   |
| rs4898197  | <i>POLA1</i>  |   |   | v | v | v |   | v |   |
| rs4273981  | <i>POLA1</i>  |   |   | v | v |   |   |   |   |
| rs3764770  | <i>POLA1</i>  |   |   | v | v |   |   |   |   |
| rs11573531 | <i>POLA1</i>  |   |   |   |   |   |   | v | v |
| rs11094975 | <i>POLA1</i>  |   |   |   |   | v |   |   | v |
| rs11573504 | <i>POLA1</i>  |   |   | v |   | v |   |   |   |
| rs11573534 | <i>POLA1</i>  |   |   | v |   | v |   |   |   |
| rs1858783  | <i>POLA2</i>  |   |   | v |   |   |   |   | v |
| rs2976239  | <i>POLB</i>   |   |   |   |   |   | v | v |   |
| rs3087370  | <i>POLD2</i>  |   |   |   |   | v |   | v |   |
| rs2075070  | <i>POLD2</i>  |   | v |   |   |   |   |   | v |
| rs3824999  | <i>POLD3</i>  |   | v | v |   |   |   |   |   |
| rs1292504  | <i>POLD3</i>  | v | v |   |   |   |   |   |   |
| rs7963858  | <i>POLE</i>   |   |   |   |   | v | v |   | v |
| rs4883536  | <i>POLE</i>   |   |   |   |   | v |   |   | v |
| rs2307449  | <i>POLG</i>   |   |   | v | v |   |   |   |   |
| rs3730463  | <i>POLL</i>   | v |   |   |   |   | v |   |   |
| rs3730476  | <i>POLL</i>   |   |   |   |   | v | v | v |   |
| rs1055362  | <i>POLL</i>   |   |   |   |   | v | v | v |   |
| rs1549067  | <i>POLL</i>   |   |   |   |   | v | v | v |   |
| rs7660498  | <i>POLN</i>   |   |   | v |   | v |   |   |   |
| rs3218651  | <i>POLQ</i>   | v | v |   | v |   |   |   |   |
| rs3998860  | <i>TET1</i>   |   |   |   |   | v |   |   | v |
| rs12221107 | <i>TET1</i>   | v |   | v |   |   |   |   |   |
| rs2076472  | <i>APO2</i>   |   |   |   |   |   | v | v |   |
| rs139297   | <i>APO3H</i>  |   |   |   |   | v | v |   |   |
| rs3138353  | <i>MBD4</i>   |   |   | v | v |   |   |   |   |
| rs167715   | <i>TDG</i>    |   |   |   |   |   |   | v | v |
| rs4135064  | <i>TDG</i>    |   |   |   | v | v |   |   |   |

|            |              |   |   |   |   |   |   |   |   |
|------------|--------------|---|---|---|---|---|---|---|---|
| rs1866074  | <i>TDG</i>   |   |   | v | v |   |   |   |   |
| rs293784   | <i>OGG1</i>  |   | v |   |   | v | v |   |   |
| rs293795   | <i>OGG1</i>  |   |   |   |   | v | v |   |   |
| rs125701   | <i>OGG1</i>  |   | v | v |   |   |   |   |   |
| rs3219487  | <i>MUTYH</i> |   |   | v |   |   |   |   | v |
| rs3219484  | <i>MUTYH</i> |   |   |   |   |   | v | v | v |
| rs804267   | <i>NEIL2</i> | v |   |   |   |   | v |   |   |
| rs804256   | <i>NEIL2</i> | v |   | v |   |   |   |   |   |
| rs6982453  | <i>NEIL2</i> |   |   | v |   | v | v |   |   |
| rs4840583  | <i>NEIL2</i> |   |   | v |   |   | v |   |   |
| rs2048075  | <i>NEIL3</i> | v | v |   |   |   |   |   |   |
| rs1055678  | <i>NEIL3</i> | v |   |   | v |   |   |   |   |
| rs2877985  | <i>NEIL3</i> |   |   |   |   |   | v | v |   |
| rs13112390 | <i>NEIL3</i> |   | v |   |   |   | v |   |   |
| rs13112358 | <i>NEIL3</i> |   | v | v |   |   | v |   |   |
| rs9994685  | <i>NEIL3</i> |   |   |   |   | v | v |   |   |
| rs1876268  | <i>NEIL3</i> |   |   |   | v | v | v |   |   |
| rs3136817  | <i>APEX1</i> |   |   |   |   |   | v | v |   |
| rs2854501  | <i>XRCC1</i> |   |   | v |   |   |   | v |   |
| rs3213356  | <i>XRCC1</i> |   |   |   |   | v |   |   | v |
| rs1001581  | <i>XRCC1</i> |   |   |   |   |   |   | v | v |
| rs2854496  | <i>XRCC1</i> |   |   |   |   |   | v | v |   |
| rs1805410  | <i>PARP1</i> | v |   |   |   | v | v | v |   |
| rs3219110  | <i>PARP1</i> |   |   |   |   | v | v | v |   |
| rs1805411  | <i>PARP1</i> |   |   | v |   |   |   | v |   |
| rs1136410  | <i>PARP1</i> |   |   | v |   |   |   | v |   |
| rs2666428  | <i>PARP1</i> |   |   |   |   | v |   | v |   |
| rs3219090  | <i>PARP1</i> |   |   |   |   | v |   | v |   |
| rs3754376  | <i>PARP1</i> |   |   |   |   | v |   | v |   |
| rs3093872  | <i>PARP2</i> |   | v |   |   | v | v | v | v |
| rs3093921  | <i>PARP2</i> |   |   |   | v |   |   |   | v |

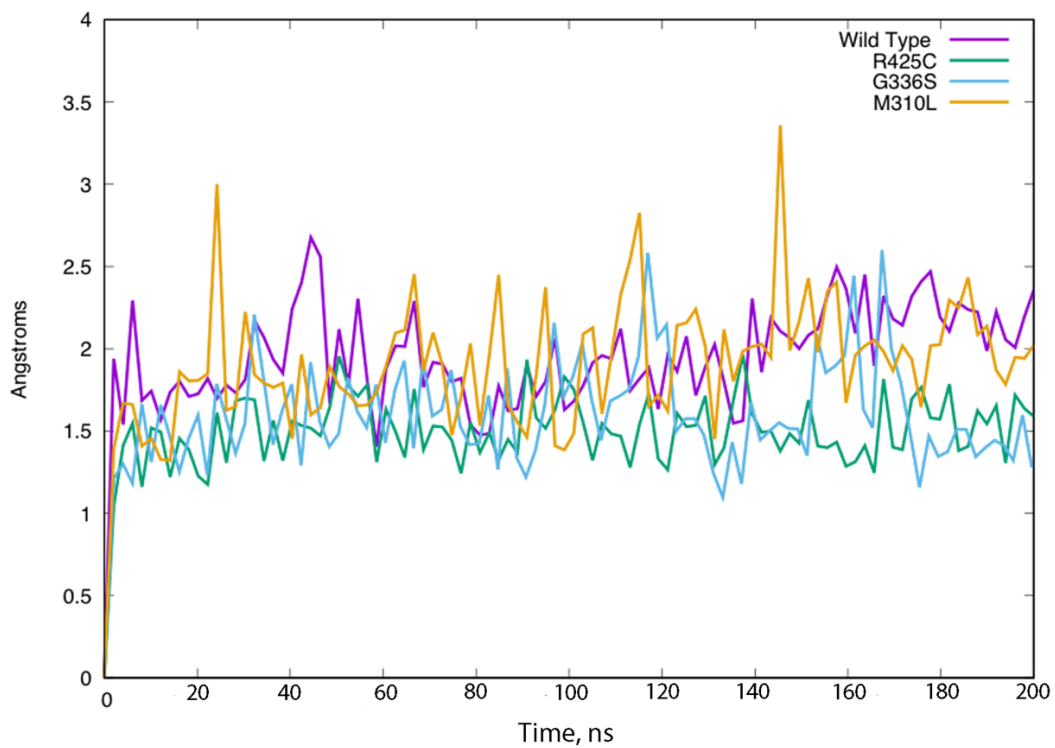

Figure S1. RMSD of DNA (only) in the holo structures of Pol v.

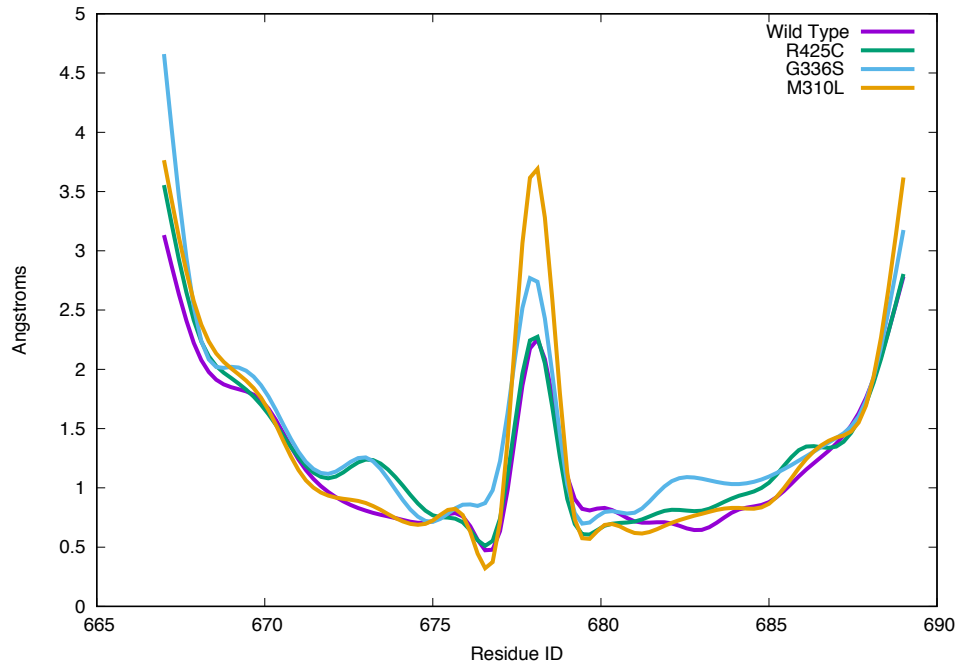

Figure S2. RMSF of DNA in the holo structures of Pol v.

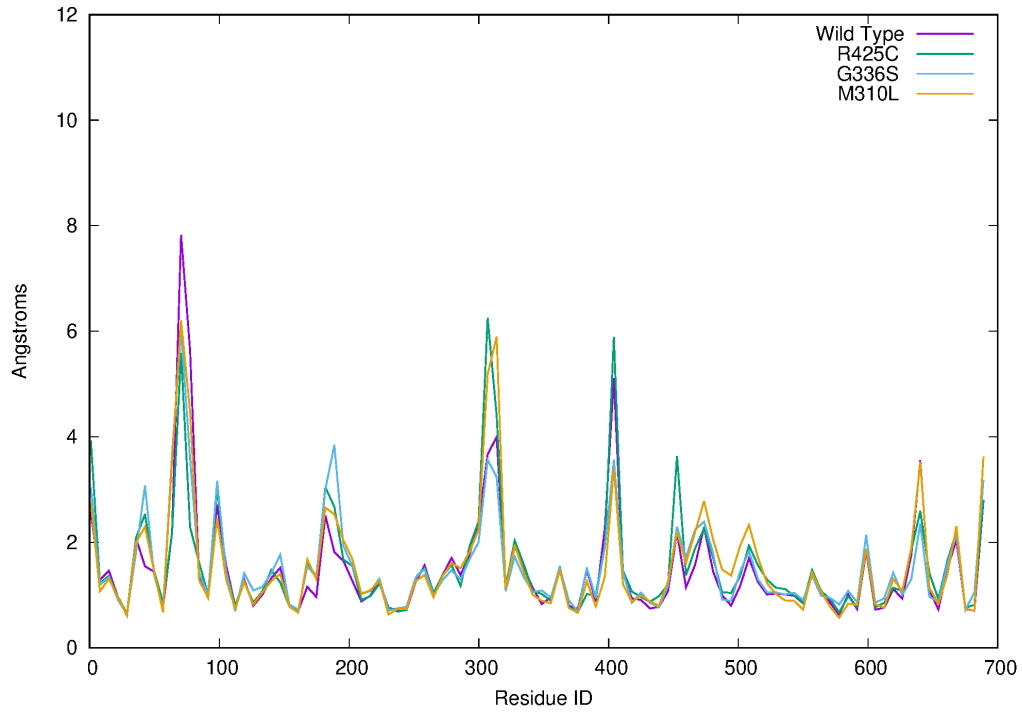

Figure S3. RMSF per residue for each system for simulation replicate 1.

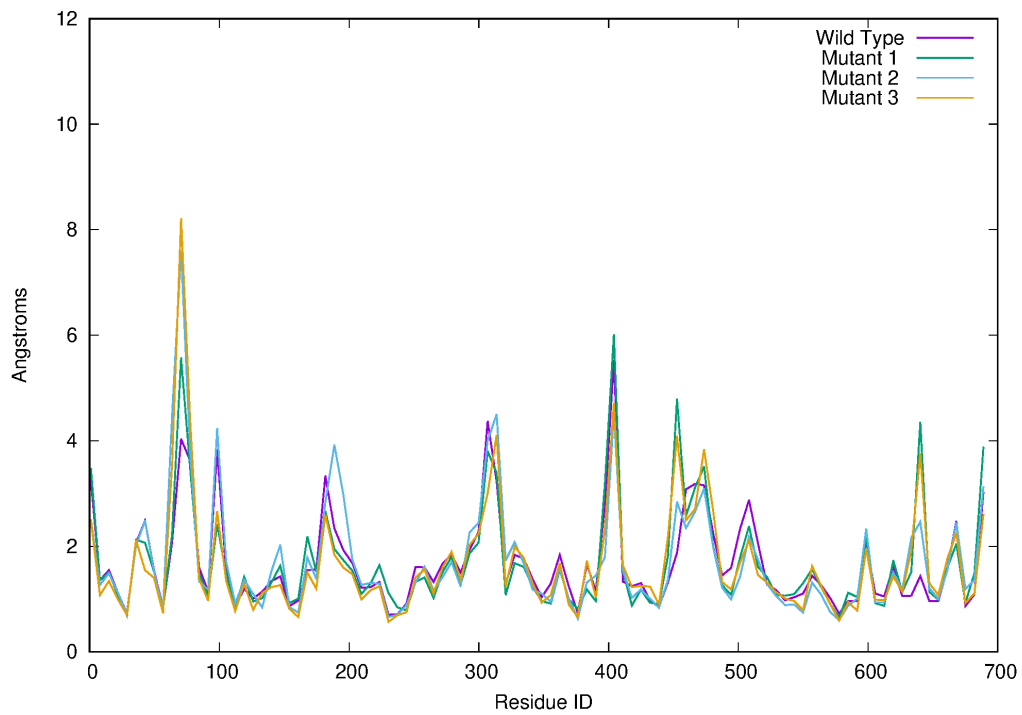

Figure S4. RMSF per residue for each system for simulation replicate 2.



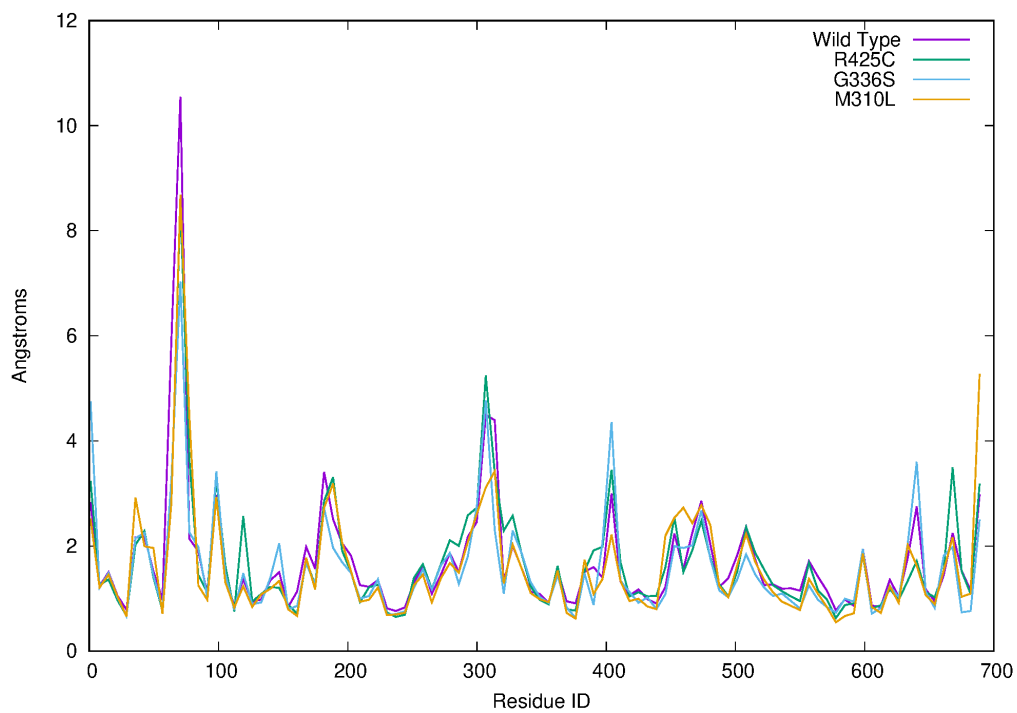

Figure S5. RMSF per residue for each system for simulation replicate 3.

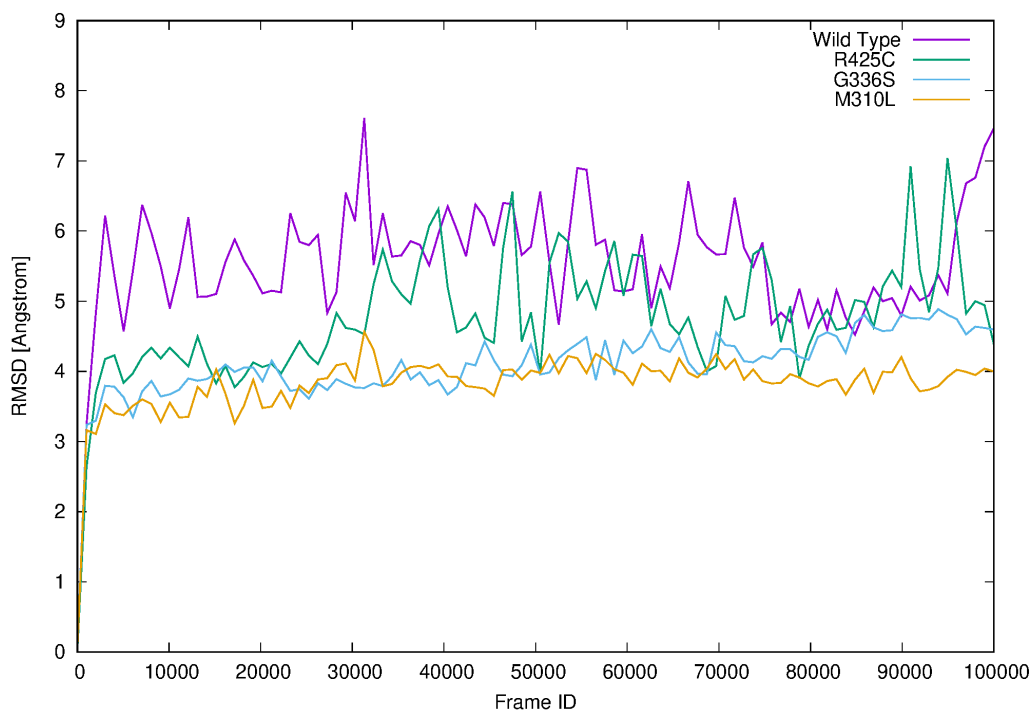

Figure S6 RMSD for all systems without DNA bound
